# Supplementary material for: Confining MoS2 nanodots in 3D porous nitrogen-doped graphene with amendable ORR performance
Source: Royal Society of Chemistry journal article supplement (doi:10.1039/c5ta00648a), 2015-01-01
Supplement: c5ta00648a1.pdf [file c5ta00648a1.pdf]

## Supporting information

### Confining MoS<sub>2</sub> nanodots in 3D porous nitrogen-doped graphene with amendable ORR performance

Cuicui Du, Hao Huang, Xun Feng, Siyuan Wu and Wenbo Song\*

*College of Chemistry, Jilin University, Changchun 130012, P.R. China*

Email: [wbsong@jlu.edu.cn](mailto:wbsong@jlu.edu.cn)

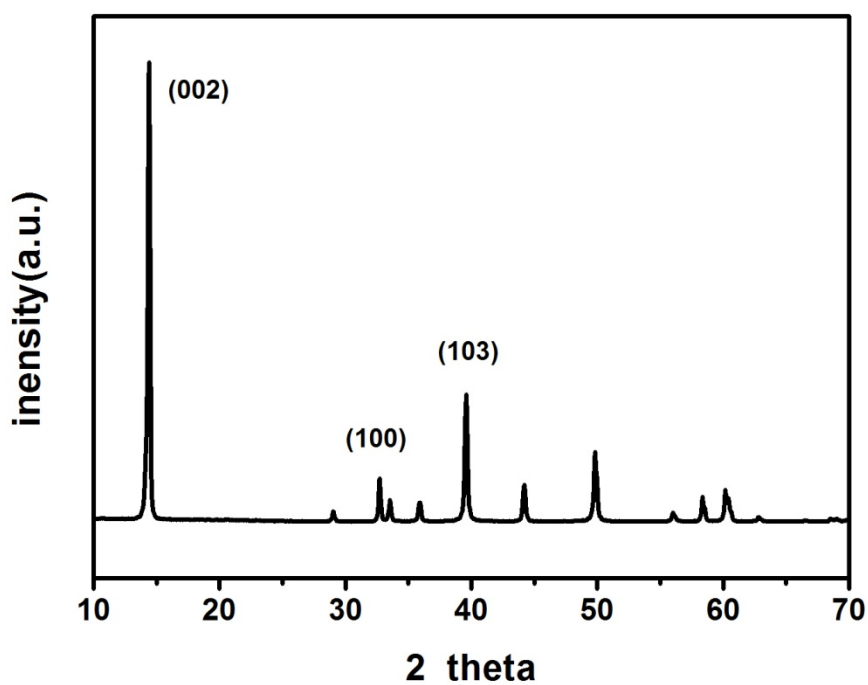

**Figure S1.** XRD pattern of bulk MoS<sub>2</sub>.

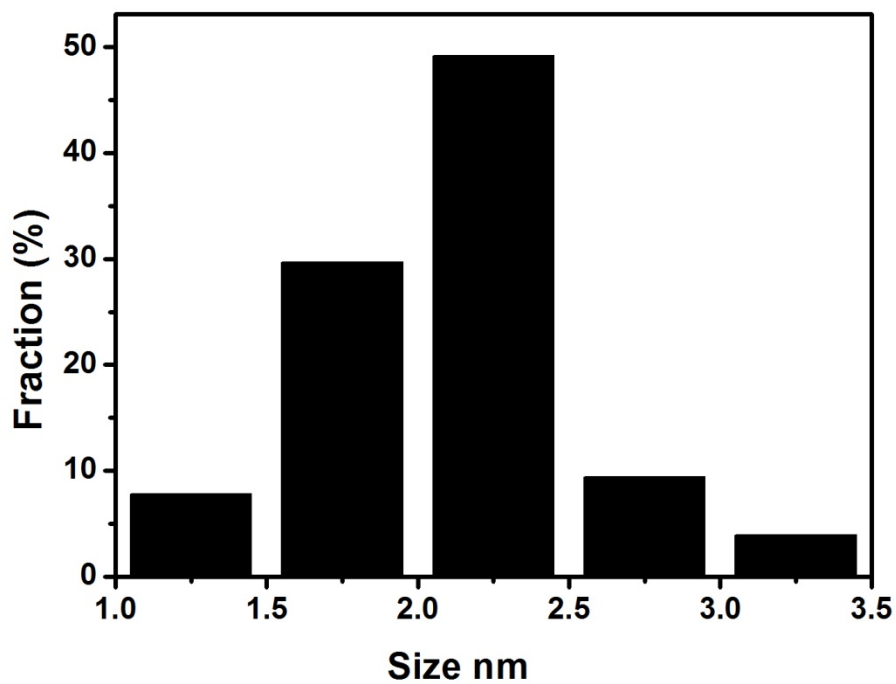

**Figure S2.** The size distribution of MoS<sub>2</sub> NDs dispersed on NGr.

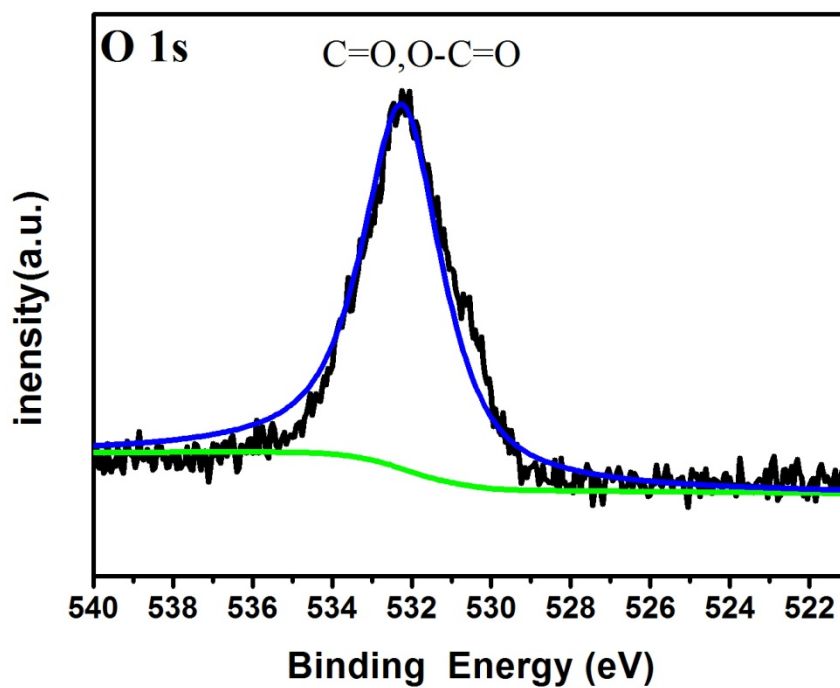

**Figure S3.** The high resolution O 1s spectrum of MoS<sub>2</sub> NDs/NGr.

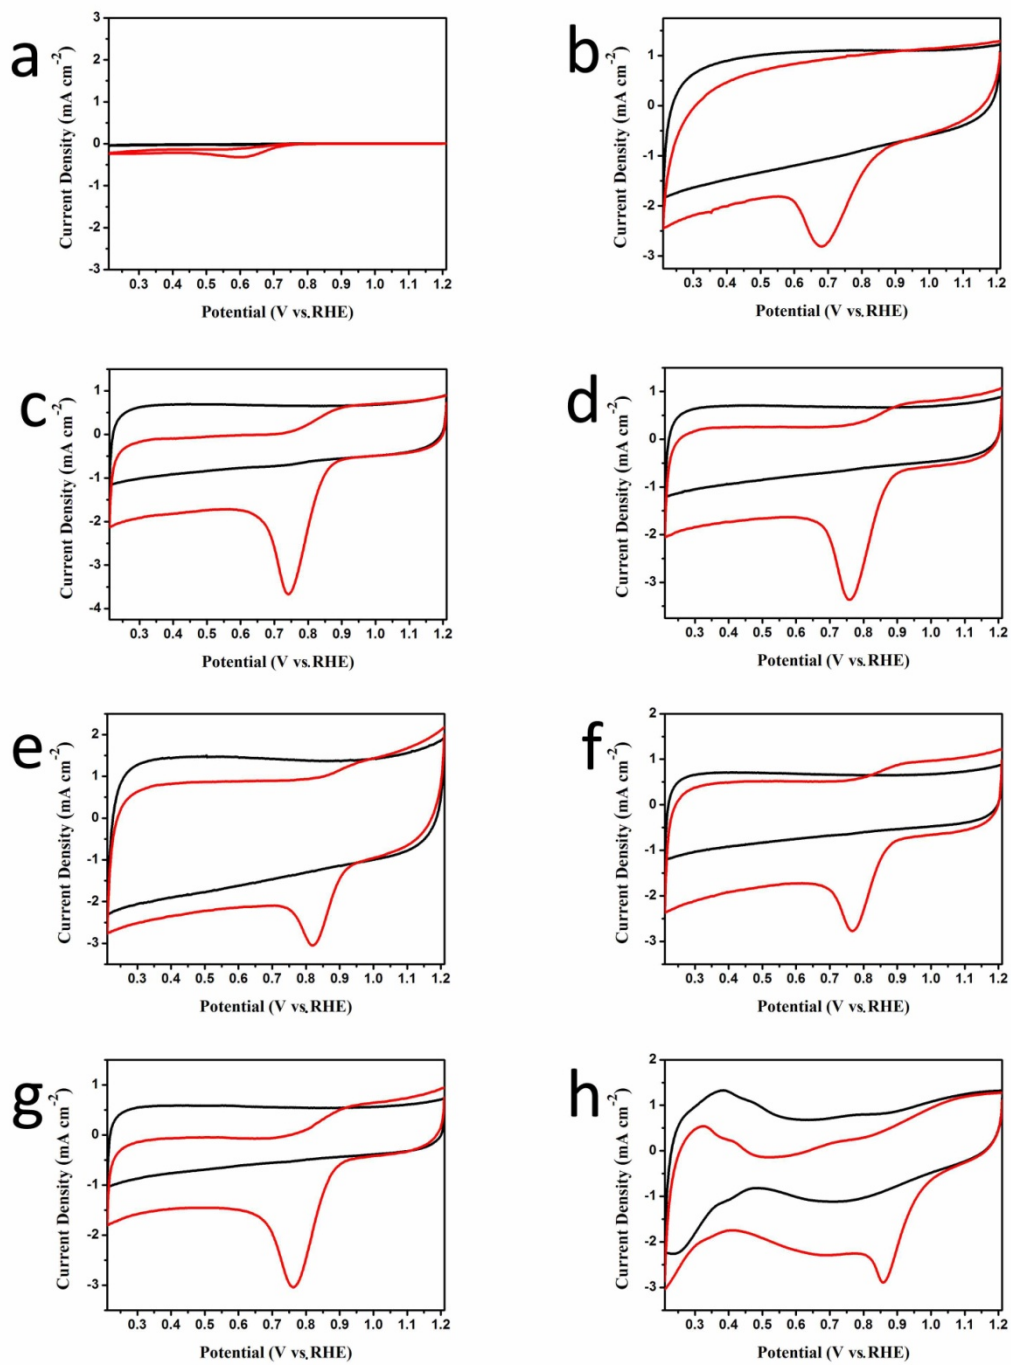

**Figure S4.** CVs of various samples in N<sub>2</sub>- (black) and O<sub>2</sub>- (red) saturated electrolyte.

(a) MoS<sub>2</sub> NDs, (b) NGr, (c) MoS<sub>2</sub> NDs/NGr-1, (d) MoS<sub>2</sub> NDs/NGr-2, (e) MoS<sub>2</sub>

NDs/NGr-3, (f) MoS<sub>2</sub> NDs/NGr-4, (g) MoS<sub>2</sub> NDs/NGr-5 and (h) Pt/C .
